# Supplementary material for: Discovery of genomic variations by whole-genome resequencing of the North American Araucana chicken
Source: PLoS One. 2019 Dec 10;14(12):e0225834. doi: 10.1371/journal.pone.0225834 (PMC6903725; doi:10.1371/journal.pone.0225834)
Supplement: S6 Table — (XLSX) [file pone.0225834.s008.xlsx]

## Sheet: Sheet1
S6 Table. Number of positions in NAA, KA, KD and WL where the alternate allele is present in at least one bird within the group.
Group	Total_positions	Non-homozygous_reference_positions	%_alt_allele_present
NAA	9422906	7659812	0.812893
KA	9422906	6486611	0.688388
KD	9422906	5843919	0.620182
WL	9422906	4901627	0.520182
