# Supplementary material for: Discovery of genomic variations by whole-genome resequencing of the North American Araucana chicken
Source: PLoS One. 2019 Dec 10;14(12):e0225834. doi: 10.1371/journal.pone.0225834 (PMC6903725; doi:10.1371/journal.pone.0225834)
Supplement: S8 Table — (XLSX) [file pone.0225834.s010.xlsx]

## Sheet: Vertical
S8 Table. GO terms including molecular function and cellular components for candidate genes.
Ensembl ID	ENSGALG00000000908		ENSGALG00000002536		ENSGALG00000002557		ENSGALG00000004756		ENSGALG00000004814		ENSGALG00000005657		ENSGALG00000006562		ENSGALG00000008477		ENSGALG00000009974		ENSGALG00000009977		ENSGALG00000009982		ENSGALG00000010352		ENSGALG00000011630		ENSGALG00000011910		ENSGALG00000011998		ENSGALG00000012000		ENSGALG00000014974		ENSGALG00000015211		ENSGALG00000015307		ENSGALG00000015379		ENSGALG00000016547		ENSGALG00000016845		ENSGALG00000017389		ENSGALG00000134538		ENSGALG00000019277
Gene Name	ADAT1		STX2		ADGRD1		CEP89		RHPN2		CRHR2		MCF2		EXOC4		MMAA		SMAD1		ZNF827		ARHGEF26		GLI2		MNAT1		SEC24D		METTL14		MIB1		DTNA		ABI3BP		TAGLN3		TXLNG		NAXD		SIX4		SLCO1B1		SLCO1B3
Method detected	RF		SS		SS		RF		RF		RF		RF		RF		SS		SS		SS		RF		RF		RF		SS		SS		RF		RF		RF		RF		RF		RF		RF		SS		SS
GO terms	GO:0003723	RNA binding	GO:0016020	membrane	GO:0016020	membrane	GO:0007268	chemical synaptic transmission	GO:0007165	signal transduction	GO:0016020	membrane	GO:0035556	intracellular signal transduction	GO:0015031	protein transport	GO:0005525	GTP binding	GO:0003677	DNA binding	GO:0003676	nucleic acid binding	GO:0005089	Rho guanyl-nucleotide exchange factor activity	GO:0006366	transcription from RNA polymerase II promoter	GO:0006289	nucleotide-excision repair	GO:0008270	zinc ion binding	GO:0005634	nucleus	GO:0004842	ubiquitin-protein transferase activity	GO:0046872	metal ion binding	GO:0005518	collagen binding	GO:0051015	actin filament binding	GO:0019905	syntaxin binding	GO:0000166	nucleotide binding	GO:0003677	DNA binding	GO:0016020	membrane	GO:0016020
	GO:0004000	adenosine deaminase activity	GO:0016021	integral component of membrane	GO:0016021	integral component of membrane	GO:0060271	cilium assembly	GO:0007165	signal transduction	GO:0016021	integral component of membrane	GO:0005622	intracellular	GO:0006904	vesicle docking involved in exocytosis	GO:0003924	GTPase activity	GO:0005634	nucleus	GO:0003676	nucleic acid binding	GO:0035023	regulation of Rho protein signal transduction	GO:0003676	nucleic acid binding	GO:0006468	protein phosphorylation	GO:0006886	intracellular protein transport	GO:0003723	RNA binding	GO:0016567	protein ubiquitination	GO:0008270	zinc ion binding	GO:0005539	glycosaminoglycan binding	GO:0000122	negative regulation of transcription from RNA polymerase II promoter	GO:0046982	protein heterodimerization activity	GO:0005524	ATP binding	GO:0005634	nucleus	GO:0016021	integral component of membrane	GO:0016021
	GO:0006396	RNA processing	GO:0016192	vesicle-mediated transport	GO:0004930	G-protein coupled receptor activity	GO:0005814	centriole	GO:0007165	signal transduction	GO:0004930	G-protein coupled receptor activity	GO:0005085	guanyl-nucleotide exchange factor activity	GO:0000145	exocyst	GO:0042802	identical protein binding	GO:0006366	transcription from RNA polymerase II promoter			GO:0005089	Rho guanyl-nucleotide exchange factor activity	GO:0000978	RNA polymerase II proximal promoter sequence-specific DNA binding	GO:0005675	holo TFIIH complex	GO:0006888	ER to Golgi vesicle-mediated transport	GO:0030154	cell differentiation	GO:0046872	metal ion binding	GO:0046872	metal ion binding	GO:0008201	heparin binding	GO:0005634	nucleus	GO:0010564	regulation of cell cycle process	GO:0016829	lyase activity	GO:0006366	transcription from RNA polymerase II promoter	GO:0055085	transmembrane transport	GO:0055085
	GO:0008251	tRNA-specific adenosine deaminase activity	GO:0030154	cell differentiation	GO:0007186	G-protein coupled receptor signaling pathway	GO:0007005	mitochondrion organization			GO:0007165	signal transduction	GO:0005089	Rho guanyl-nucleotide exchange factor activity	GO:0045202	synapse	GO:0042803	protein homodimerization activity	GO:0006351	transcription, DNA-templated			GO:0035023	regulation of Rho protein signal transduction	GO:0001077	transcriptional activator activity, RNA polymerase II proximal promoter sequence-specific DNA binding	GO:0006357	regulation of transcription from RNA polymerase II promoter	GO:0015031	protein transport	GO:0007283	spermatogenesis	GO:0008270	zinc ion binding	GO:0005737	cytoplasm	GO:0010811	positive regulation of cell-substrate adhesion	GO:0043209	myelin sheath	GO:0030500	regulation of bone mineralization	GO:0047453	ATP-dependent NAD(P)H-hydrate dehydratase activity	GO:0006355	regulation of transcription, DNA-templated	GO:0005886	plasma membrane	GO:0005886
	GO:0008033	tRNA processing	GO:0007340	acrosome reaction	GO:0005622	intracellular	GO:1905515	non-motile cilium assembly			GO:0007186	G-protein coupled receptor signaling pathway	GO:0035023	regulation of Rho protein signal transduction	GO:0007268	chemical synaptic transmission			GO:0006355	regulation of transcription, DNA-templated			GO:0001886	endothelial cell morphogenesis	GO:0003677	DNA binding	GO:0008094	DNA-dependent ATPase activity	GO:0000139	Golgi membrane	GO:0000398	mRNA splicing, via spliceosome	GO:0005737	cytoplasm	GO:0008270	zinc ion binding	GO:0030198	extracellular matrix organization	GO:0051015	actin filament binding	GO:0051726	regulation of cell cycle	GO:0052855	ADP-dependent NAD(P)H-hydrate dehydratase activity	GO:0043565	sequence-specific DNA binding	GO:0006811	ion transport	GO:0006811
			GO:0005886	plasma membrane	GO:0004888	transmembrane signaling receptor activity	GO:0000922	spindle pole			GO:0004888	transmembrane signaling receptor activity	GO:0016358	dendrite development	GO:0006887	exocytosis			GO:0003700	DNA binding transcription factor activity			GO:0097178	ruffle assembly	GO:0003682	chromatin binding	GO:0008353	RNA polymerase II carboxy-terminal domain kinase activity	GO:0030127	COPII vesicle coat	GO:0003729	mRNA binding	GO:0006897	endocytosis	GO:0046872	metal ion binding	GO:0005614	interstitial matrix	GO:0051015	actin filament binding	GO:0005829	cytosol	GO:0046496	nicotinamide nucleotide metabolic process	GO:0000978	RNA polymerase II proximal promoter sequence-specific DNA binding	GO:0005215	transporter activity	GO:0005215
* RF - Random forest			GO:0006886	intracellular protein transport	GO:0007166	cell surface receptor signaling pathway	GO:0005813	centrosome			GO:0007166	cell surface receptor signaling pathway	GO:1990830	cellular response to leukemia inhibitory factor	GO:0006893	Golgi to plasma membrane transport			GO:0005737	cytoplasm					GO:0003700	DNA binding transcription factor activity	GO:0047485	protein N-terminus binding	GO:0000149	SNARE binding	GO:0001510	RNA methylation	GO:0001568	blood vessel development	GO:0005737	cytoplasm	GO:0031012	extracellular matrix	GO:0051015	actin filament binding	GO:0031965	nuclear membrane			GO:0001077	transcriptional activator activity, RNA polymerase II proximal promoter sequence-specific DNA binding
* SS - selective sweep			GO:0031201	SNARE complex	GO:0007189	adenylate cyclase-activating G-protein coupled receptor signaling pathway	GO:0005829	cytosol			GO:0032099	negative regulation of appetite	GO:0035556	intracellular signal transduction	GO:0006612	protein targeting to membrane			GO:0005622	intracellular					GO:0008134	transcription factor binding	GO:0061575	cyclin-dependent protein serine/threonine kinase activator activity	GO:0090110	cargo loading into COPII-coated vesicle	GO:0061157	mRNA destabilization	GO:0001756	somitogenesis	GO:0008270	zinc ion binding			GO:0051015	actin filament binding					GO:0003700	DNA binding transcription factor activity
			GO:0005484	SNAP receptor activity	GO:0005886	plasma membrane	GO:0005886	plasma membrane			GO:0043404	corticotropin-releasing hormone receptor activity	GO:0005622	intracellular	GO:0017160	Ral GTPase binding			GO:0005667	transcription factor complex					GO:0008270	zinc ion binding	GO:0000079	regulation of cyclin-dependent protein serine/threonine kinase activity			GO:0080009	mRNA methylation	GO:0001841	neural tube formation	GO:0046872	metal ion binding			GO:0051015	actin filament binding					GO:0007519	skeletal muscle tissue development
			GO:0031629	synaptic vesicle fusion to presynaptic active zone membrane	GO:0016020	membrane	GO:0031514	motile cilium			GO:0009755	hormone-mediated signaling pathway	GO:0005085	guanyl-nucleotide exchange factor activity	GO:0030165	PDZ domain binding			GO:0007179	transforming growth factor beta receptor signaling pathway					GO:0043565	sequence-specific DNA binding	GO:0006281	DNA repair			GO:0036396	RNA N6-methyladenosine methyltransferase complex	GO:0001947	heart looping	GO:0008270	zinc ion binding									GO:0008582	regulation of synaptic growth at neuromuscular junction
			GO:0000149	SNARE binding	GO:0016021	integral component of membrane	GO:0097539	ciliary transition fiber			GO:0043435	response to corticotropin-releasing hormone	GO:0005089	Rho guanyl-nucleotide exchange factor activity	GO:0047485	protein N-terminus binding									GO:0044212	transcription regulatory region DNA binding	GO:0006355	regulation of transcription, DNA-templated			GO:0016422	mRNA (2'-O-methyladenosine-N6-)-methyltransferase activity	GO:0007219	Notch signaling pathway	GO:0032991	macromolecular complex									GO:0008584	male gonad development
			GO:0048278	vesicle docking	GO:0004930	G-protein coupled receptor activity	GO:0097730	non-motile cilium					GO:0035023	regulation of Rho protein signal transduction	GO:0006903	vesicle targeting									GO:1990841	promoter-specific chromatin binding	GO:0006366	transcription from RNA polymerase II promoter			GO:0006402	mRNA catabolic process	GO:0007507	heart development	GO:0046872	metal ion binding									GO:0010468	regulation of gene expression
			GO:0008021	synaptic vesicle	GO:0007186	G-protein coupled receptor signaling pathway									GO:0048341	paraxial mesoderm formation									GO:0000122	negative regulation of transcription from RNA polymerase II promoter	GO:0007512	adult heart development			GO:0019827	stem cell population maintenance	GO:0045665	negative regulation of neuron differentiation	GO:0008270	zinc ion binding									GO:0030238	male sex determination
			GO:0016020	membrane	GO:0004888	transmembrane signaling receptor activity									GO:0005737	cytoplasm									GO:0001501	skeletal system development	GO:0021591	ventricular system development			GO:0021861	forebrain radial glial cell differentiation	GO:0045807	positive regulation of endocytosis											GO:0030910	olfactory placode formation
			GO:0016021	integral component of membrane	GO:0007166	cell surface receptor signaling pathway									GO:0005902	microvillus									GO:0001649	osteoblast differentiation	GO:0045737	positive regulation of cyclin-dependent protein serine/threonine kinase activity			GO:0042063	gliogenesis	GO:0005813	centrosome											GO:0032880	regulation of protein localization
			GO:0016192	vesicle-mediated transport											GO:0032584	growth cone membrane									GO:0001822	kidney development	GO:0045944	positive regulation of transcription from RNA polymerase II promoter			GO:0005654	nucleoplasm	GO:0031410	cytoplasmic vesicle											GO:0034504	protein localization to nucleus
			GO:0030154	cell differentiation											GO:0035748	myelin sheath abaxonal region									GO:0002009	morphogenesis of an epithelium	GO:0051592	response to calcium ion																	GO:0042472	inner ear morphogenesis
			GO:0007340	acrosome reaction																					GO:0002062	chondrocyte differentiation	GO:0005654	nucleoplasm																	GO:0043066	negative regulation of apoptotic process
			GO:0016020	membrane																					GO:0002076	osteoblast development	GO:0005829	cytosol																	GO:0043524	negative regulation of neuron apoptotic process
			GO:0016021	integral component of membrane																					GO:0007224	smoothened signaling pathway																			GO:0043586	tongue development
			GO:0005622	intracellular																					GO:0007389	pattern specification process																			GO:0045214	sarcomere organization
			GO:0006886	intracellular protein transport																					GO:0007411	axon guidance																			GO:0045892	negative regulation of transcription, DNA-templated
			GO:0016192	vesicle-mediated transport																					GO:0007418	ventral midline development																			GO:0045893	positive regulation of transcription, DNA-templated
			GO:0005484	SNAP receptor activity																					GO:0007442	hindgut morphogenesis																			GO:0045944	positive regulation of transcription from RNA polymerase II promoter
			GO:0061025	membrane fusion																					GO:0007507	heart development																			GO:0046661	male sex differentiation
			GO:0030154	cell differentiation																					GO:0008283	cell proliferation																			GO:0048538	thymus development
			GO:0007340	acrosome reaction																					GO:0008284	positive regulation of cell proliferation																			GO:0048699	generation of neurons
			GO:0046983	protein dimerization activity																					GO:0008589	regulation of smoothened signaling pathway																			GO:0048701	embryonic cranial skeleton morphogenesis
			GO:0033194	response to hydroperoxide																					GO:0009952	anterior/posterior pattern specification																			GO:0048704	embryonic skeletal system morphogenesis
			GO:0051259	protein oligomerization																					GO:0009953	dorsal/ventral pattern formation																			GO:0048856	anatomical structure development
			GO:1903575	cornified envelope assembly																					GO:0009954	proximal/distal pattern formation																			GO:0050678	regulation of epithelial cell proliferation
			GO:0005615	extracellular space																					GO:0021508	floor plate formation																			GO:0051451	myoblast migration
			GO:0005886	plasma membrane																					GO:0021513	spinal cord dorsal/ventral patterning																			GO:0060037	pharyngeal system development
			GO:0016323	basolateral plasma membrane																					GO:0021517	ventral spinal cord development																			GO:0061055	myotome development
			GO:0030027	lamellipodium																					GO:0021522	spinal cord motor neuron differentiation																			GO:0061197	fungiform papilla morphogenesis
			GO:0016020	membrane																					GO:0021696	cerebellar cortex morphogenesis																			GO:0061551	trigeminal ganglion development
			GO:0016021	integral component of membrane																					GO:0021775	smoothened signaling pathway involved in ventral spinal cord interneuron specification																			GO:0072075	metanephric mesenchyme development
			GO:0005622	intracellular																					GO:0021776	smoothened signaling pathway involved in spinal cord motor neuron cell fate specification																			GO:0072095	regulation of branch elongation involved in ureteric bud branching
			GO:0006886	intracellular protein transport																					GO:0021904	dorsal/ventral neural tube patterning																			GO:0072107	positive regulation of ureteric bud formation
			GO:0016192	vesicle-mediated transport																					GO:0021915	neural tube development																			GO:0090190	positive regulation of branching involved in ureteric bud morphogenesis
			GO:0005484	SNAP receptor activity																					GO:0021938	smoothened signaling pathway involved in regulation of cerebellar granule cell precursor cell proliferation																			GO:0098528	skeletal muscle fiber differentiation
			GO:0061025	membrane fusion																					GO:0021965	spinal cord ventral commissure morphogenesis																			GO:1902725	negative regulation of satellite cell differentiation
			GO:0030154	cell differentiation																					GO:0021983	pituitary gland development																			GO:0005737	cytoplasm
			GO:0007340	acrosome reaction																					GO:0030154	cell differentiation
																									GO:0030324	lung development
																									GO:0030902	hindbrain development
																									GO:0032331	negative regulation of chondrocyte differentiation
																									GO:0035295	tube development
																									GO:0042733	embryonic digit morphogenesis
																									GO:0043066	negative regulation of apoptotic process
																									GO:0045666	positive regulation of neuron differentiation
																									GO:0045740	positive regulation of DNA replication
																									GO:0045893	positive regulation of transcription, DNA-templated
																									GO:0045944	positive regulation of transcription from RNA polymerase II promoter
																									GO:0048566	embryonic digestive tract development
																									GO:0048589	developmental growth
																									GO:0048646	anatomical structure formation involved in morphogenesis
																									GO:0048666	neuron development
																									GO:0048754	branching morphogenesis of an epithelial tube
																									GO:0048856	anatomical structure development
																									GO:0060032	notochord regression
																									GO:0060322	head development
																									GO:0060513	prostatic bud formation
																									GO:0060831	smoothened signaling pathway involved in dorsal/ventral neural tube patterning
																									GO:0071407	cellular response to organic cyclic compound
																									GO:0090103	cochlea morphogenesis
																									GO:0005634	nucleus
																									GO:0005730	nucleolus
																									GO:0005737	cytoplasm
																									GO:0005929	cilium
																									GO:0005930	axoneme
																									GO:0016020	membrane
																									GO:0016607	nuclear speck
																									GO:0031514	motile cilium
																									GO:0097542	ciliary tip
																									GO:0003676	nucleic acid binding
																									GO:0003676	nucleic acid binding
[truncated: 26 more columns]
