# Supplementary material for: Discovery of genomic variations by whole-genome resequencing of the North American Araucana chicken
Source: PLoS One. 2019 Dec 10;14(12):e0225834. doi: 10.1371/journal.pone.0225834 (PMC6903725; doi:10.1371/journal.pone.0225834)
Supplement: S9 Table — (XLSX) [file pone.0225834.s011.xlsx]

## Sheet: Sheet1
S9 Table. Description and GO annotation for the genes associated with SNPs from RF and Selective Sweep analyses.
Compressed List 1	Gene name	Analysis	Gene name	Biological process
ENSGALG00000015379	TAGLN3	RF	Transgelin 3	Actin Binding
ENSGALG00000029378	ITGA9	RF	Integrin Subunit Alpha 9	Cell adhesion
ENSGALG00000031741	PTK2	RF	Protein Tyrosine Kinase 2	Cell adhesion
ENSGALG00000011910	MNAT1	RF	MNAT1, CDK Activating Kinase Assembly Factor	Cell cycle control
ENSGALG00000016548	SYAP1	RF	synapse associated protein 1	cellular response to insulin stimulus
ENSGALG00000004756	CEP89	RF	Centrosomal Protein 89	Centrosome protein
ENSGALG00000027323	MYH1D	SS	Myosin Heavy Chain 1D	Cytoskeleton
ENSGALG00000042257	MYH1F	SS	Myosin Heavy Chain 1F	Cytoskeleton
ENSGALG00000034534	FAAP24	RF	FA Core Complex Associated Protein 24	DNA repair
ENSGALG00000002557	ADGRD1	SS	Adhesion G Protein-Coupled Receptor D1	G-protein coupled receptor
ENSGALG00000005657	CRHR2	RF	Corticotropin Releasing Hormone Receptor 2	G-protein coupled receptor
ENSGALG00000009974	MMAA	SS	Methylmalonic Aciduria (Cobalamin Deficiency) CblA Type	GTPase
ENSGALG00000004814	RHPN2	RF	Rhophilin Rho GTPase Binding Protein 2	GTPase
ENSGALG00000010352	ARHGEF26	RF	Rho Guanine Nucleotide Exchange Factor 26	Guanine nucleotide exchange factor
ENSGALG00000006562	MCF2	RF	MCF.2 Cell Line Derived Transforming Sequence	Guanine nucleotide exchange factor
ENSGALG00000016845	NAXD	RF	NAD(P)HX Dehydratase	Metabolism
ENSGALG00000041255	ADAM12	RF	ADAM Metallopeptidase Domain 12	Metal ion binding
ENSGALG00000009982	ZNF827	SS	Zinc Finger Protein 827	Nuclei acid binding
ENSGALG00000015307	ABI3BP	RF	ABI Family Member 3 Binding Protein	Positive regulation of cell-substrate adhesion
ENSGALG00000043223	COL26A1	RF	Collagen Type XXVI Alpha 1 Chain	Positive regulation of cell-substrate adhesion
ENSGALG00000002242	GALNT9	RF	polypeptide N-acetylgalactosaminyltransferase 9	Protein glycosylation
ENSGALG00000002272	NOC4L	RF	nucleolar complex associated 4 homolog (NOC4L)	ribosome biogenesis
ENSGALG00000000908	ADAT1	RF	Adenosine Deaminase, TRNA Specific 1	RNA binding
ENSGALG00000012000	METTL14	SS	Methyltransferase Like 14	RNA binding
ENSGALG00000036938	RALYL	RF	RALY RNA Binding Protein Like	RNA binding
ENSGALG00000015211	DTNA	RF	Dystrobrevin Alpha	Signal transduction
ENSGALG00000011630	GLI2	RF	GLI Family Zinc Finger 2	Signaling pathway
Compressed List 1	Gene name	Analysis	Gene name	Biological process
ENSGALG00000009977	SMAD1	SS	SMAD Family Member 1	Signaling pathway
ENSGALG00000017389	SIX4	RF	SIX Homeobox 4	Transcription factor
ENSGALG00000019277	SLCO1B3	SS	Solute Carrier Organic Anion Transporter Family Member 1B3	Transmembrane transport
ENSGALG00000134538	SLCO1B1	SS	Solute Carrier Organic Anion Transporter Family Member 1B1	Transmembrane transport
ENSGALG00000014974	MIB1	RF	Mindbomb E3 Ubiquitin Protein Ligase 1	Ubiquitin ligase
ENSGALG00000042125	AP2B1	RF	Adaptor Related Protein Complex 2 Subunit Beta 1	Vesicle trafficking
ENSGALG00000008477	EXOC4	RF	Exocyst complex component 4	Vesicle trafficking
ENSGALG00000011998	SEC24D	SS	SEC24 Homolog D, COPII Coat Complex Component	Vesicle trafficking
ENSGALG00000002536	STX2	SS	Syntaxin 2	Vesicle trafficking
ENSGALG00000037014	TSNARE1	SS	T-SNARE Domain Containing 1	Vesicle trafficking
ENSGALG00000016547	TXLNG	RF	Taxilin Gamma	Vesicle trafficking
ENSGALG00000041098	NOVEL	RF
ENSGALG00000046171	NOVEL	RF
ENSGALG00000042644	NOVEL	RF
ENSGALG00000037890	NOVEL	RF
ENSGALG00000043141	NOVEL	SS
ENSGALG00000028322	NOVEL	SS
ENSGALG00000026923	NOVEL	SS
